# Supplementary material for: Inflammatory Serum Proteins Are Severely Altered in Metastatic Gastric Adenocarcinoma Patients from the Chinese Population
Source: PubMed Central journal article supplement (PMC4401731; doi:10.1371/journal.pone.0123985), 2015-04-17
Supplement: pone.0123985.s001.pdf [file pone.0123985.s001.pdf]

**S1 Table:** Area under the curve (AUC) and sensitivity of individual proteins and combinations of proteins between healthy controls and all GA samples (H vs GA).

| Protein                   | AUC<br>(95% CI)           | p val                       | Specificity (%) |              |              |              |
|---------------------------|---------------------------|-----------------------------|-----------------|--------------|--------------|--------------|
|                           |                           |                             | 90              | 95           | 99           | 100          |
| OPN                       | 0.84 (0.82 - 0.85)        | 6.99 x10 <sup>-40</sup>     | 55.30           | 42.86        | 25.81        | 2.76         |
| sVCAM1                    | 0.78 (0.76 - 0.80)        | 1.59 x10 <sup>-28</sup>     | 49.24           | 39.88        | 19.64        | 10.57        |
| AGP                       | 0.72 (0.69 - 0.74)        | 1.43 x10 <sup>-15</sup>     | 19.34           | 13.99        | 3.29         | 1.23         |
| SAA                       | 0.68 (0.66 - 0.70)        | 1.94 x10 <sup>-12</sup>     | 38.43           | 31.94        | 13.43        | 7.41         |
| CRP                       | 0.55 (0.52 - 0.57)        | 7.42 x10 <sup>-2</sup>      | 27.65           | 17.51        | 11.52        | 3.23         |
| GRO                       | 0.48 (0.45 - 0.51)        | 4.97 x10 <sup>-1</sup>      | 19.07           | 18.60        | 4.19         | 0.93         |
| <b>OPN+sVCAM1+AGP</b>     | <b>0.92 (0.91 - 0.92)</b> | <b>&lt;10<sup>-99</sup></b> | <b>73.55</b>    | <b>61.87</b> | <b>17.43</b> | <b>1.14</b>  |
| <b>OPN+sVCAM1+SAA</b>     | <b>0.91 (0.91 - 0.92)</b> | <b>&lt;10<sup>-99</sup></b> | <b>73.07</b>    | <b>62.85</b> | <b>30.05</b> | <b>13.72</b> |
| <b>OPN+sVCAM1+CRP</b>     | <b>0.92 (0.91 - 0.92)</b> | <b>&lt;10<sup>-99</sup></b> | <b>73.25</b>    | <b>60.36</b> | <b>20.81</b> | <b>8.98</b>  |
| OPN+sVCAM1+GRO            | 0.90 (0.90 - 0.90)        | <10 <sup>-99</sup>          | 70.82           | 61.94        | 10.92        | 3.07         |
| OPN+AGP+SAA               | 0.90 (0.90 - 0.90)        | <10 <sup>-99</sup>          | 67.10           | 47.34        | 9.63         | 0.00         |
| OPN+AGP+CRP               | 0.88 (0.88 - 0.88)        | <10 <sup>-99</sup>          | 62.92           | 48.33        | 8.85         | 0.00         |
| OPN+AGP+GRO               | 0.85 (0.84 - 0.86)        | <10 <sup>-99</sup>          | 56.26           | 37.76        | 10.29        | 0.00         |
| OPN+SAA+CRP               | 0.84 (0.84 - 0.85)        | <10 <sup>-99</sup>          | 53.70           | 41.86        | 25.72        | 3.11         |
| OPN+SAA+GRO               | 0.83 (0.82 - 0.83)        | <10 <sup>-99</sup>          | 55.84           | 36.83        | 23.27        | 15.67        |
| OPN+CRP+GRO               | 0.82 (0.81 - 0.83)        | <10 <sup>-99</sup>          | 51.66           | 38.32        | 18.69        | 8.02         |
| <b>OPN+sVCAM1+AGP+SAA</b> | <b>0.94 (0.94 - 0.94)</b> | <b>&lt;10<sup>-99</sup></b> | <b>82.47</b>    | <b>69.06</b> | <b>34.63</b> | <b>0.00</b>  |
| <b>OPN+sVCAM1+AGP+CRP</b> | <b>0.93 (0.93 - 0.94)</b> | <b>&lt;10<sup>-99</sup></b> | <b>76.97</b>    | <b>67.50</b> | <b>12.72</b> | <b>0.00</b>  |
| OPN+sVCAM1+AGP+GRO        | 0.90 (0.89 - 0.90)        | <10 <sup>-99</sup>          | 67.30           | 56.44        | 7.87         | 0.28         |
| <b>OPN+sVCAM1+SAA+CRP</b> | <b>0.92 (0.92 - 0.93)</b> | <b>&lt;10<sup>-99</sup></b> | <b>74.91</b>    | <b>62.90</b> | <b>27.89</b> | <b>14.01</b> |
| OPN+sVCAM1+SAA+GRO        | 0.91 (0.91 - 0.92)        | <10 <sup>-99</sup>          | 75.57           | 62.84        | 33.16        | 11.42        |
| OPN+sVCAM1+CRP+GRO        | 0.89 (0.89 - 0.90)        | <10 <sup>-99</sup>          | 70.54           | 56.86        | 34.83        | 8.54         |
| OPN+AGP+SAA+CRP           | 0.91 (0.90 - 0.91)        | <10 <sup>-99</sup>          | 71.40           | 47.20        | 13.87        | 0.00         |
| OPN+AGP+SAA+GRO           | 0.89 (0.88 - 0.89)        | <10 <sup>-99</sup>          | 59.83           | 41.92        | 9.66         | 0.00         |
| OPN+AGP+CRP+GRO           | 0.86 (0.85 - 0.86)        | <10 <sup>-99</sup>          | 57.05           | 47.92        | 6.20         | 0.00         |
| OPN+SAA+CRP+GRO           | 0.84 (0.84 - 0.85)        | <10 <sup>-99</sup>          | 58.07           | 38.06        | 20.24        | 7.37         |
