# Supplementary material for: Inflammatory Serum Proteins Are Severely Altered in Metastatic Gastric Adenocarcinoma Patients from the Chinese Population
Source: PubMed Central journal article supplement (PMC4401731; doi:10.1371/journal.pone.0123985), 2015-04-17
Supplement: pone.0123985.s002.pdf [file pone.0123985.s002.pdf]

**S2 Table:** Area under the curve (AUC) and sensitivity of individual proteins and combinations of proteins between healthy controls and non-metastatic GA samples (H vs NM).

| Protein                   | AUC<br>(95% CI)           | p val                       | Specificity (%) |              |              |             |
|---------------------------|---------------------------|-----------------------------|-----------------|--------------|--------------|-------------|
|                           |                           |                             | 90              | 95           | 99           | 100         |
| OPN                       | 0.79 (0.76 - 0.81)        | 2.17 x10 <sup>-18</sup>     | 42.72           | 30.10        | 15.53        | 0.00        |
| sVCAM1                    | 0.83 (0.81 - 0.85)        | 1.75 x10 <sup>-24</sup>     | 58.91           | 50.76        | 35.65        | 33.23       |
| AGP                       | 0.82 (0.80 - 0.84)        | 2.79 x10 <sup>-21</sup>     | 46.50           | 27.16        | 17.70        | 17.28       |
| SAA                       | 0.57 (0.54 - 0.60)        | 2.58 x10 <sup>-2</sup>      | 22.55           | 19.61        | 5.88         | 1.96        |
| CRP                       | 0.41 (0.38 - 0.44)        | 8.31 x10 <sup>-3</sup>      | 16.50           | 6.80         | 4.85         | 0.00        |
| GRO                       | 0.61 (0.57 - 0.64)        | 3.01 x10 <sup>-3</sup>      | 3.45            | 1.72         | 0.57         | 0.00        |
| <b>OPN+sVCAM1+AGP</b>     | <b>0.94 (0.93 - 0.94)</b> | <b>&lt;10<sup>-99</sup></b> | <b>78.72</b>    | <b>65.23</b> | <b>9.09</b>  | <b>0.10</b> |
| <b>OPN+sVCAM1+SAA</b>     | <b>0.91 (0.90 - 0.91)</b> | <b>&lt;10<sup>-99</sup></b> | <b>71.32</b>    | <b>63.73</b> | <b>24.65</b> | <b>3.56</b> |
| OPN+sVCAM1+CRP            | 0.90 (0.90 - 0.91)        | <10 <sup>-99</sup>          | 71.37           | 56.30        | 16.87        | 2.94        |
| OPN+sVCAM1+GRO            | 0.89 (0.89 - 0.90)        | <10 <sup>-99</sup>          | 69.96           | 55.23        | 7.75         | 2.42        |
| <b>OPN+AGP+SAA</b>        | <b>0.91 (0.90 - 0.91)</b> | <b>&lt;10<sup>-99</sup></b> | <b>66.31</b>    | <b>46.29</b> | <b>3.52</b>  | <b>0.00</b> |
| OPN+AGP+CRP               | 0.88 (0.87 - 0.89)        | <10 <sup>-99</sup>          | 57.02           | 41.44        | 5.58         | 0.00        |
| OPN+AGP+GRO               | 0.84 (0.84 - 0.85)        | <10 <sup>-99</sup>          | 45.86           | 30.77        | 3.41         | 0.00        |
| OPN+SAA+CRP               | 0.79 (0.78 - 0.80)        | <10 <sup>-99</sup>          | 41.38           | 30.17        | 5.84         | 0.57        |
| OPN+SAA+GRO               | 0.80 (0.79 - 0.80)        | <10 <sup>-99</sup>          | 45.90           | 23.46        | 6.56         | 1.43        |
| OPN+CRP+GRO               | 0.79 (0.78 - 0.80)        | <10 <sup>-99</sup>          | 47.12           | 29.93        | 5.19         | 0.28        |
| <b>OPN+sVCAM1+AGP+SAA</b> | <b>0.95 (0.94 - 0.95)</b> | <b>&lt;10<sup>-99</sup></b> | <b>82.61</b>    | <b>72.99</b> | <b>24.36</b> | <b>0.00</b> |
| <b>OPN+sVCAM1+AGP+CRP</b> | <b>0.94 (0.93 - 0.94)</b> | <b>&lt;10<sup>-99</sup></b> | <b>79.65</b>    | <b>64.59</b> | <b>12.67</b> | <b>0.00</b> |
| <b>OPN+sVCAM1+AGP+GRO</b> | <b>0.92 (0.91 - 0.92)</b> | <b>&lt;10<sup>-99</sup></b> | <b>76.63</b>    | <b>59.70</b> | <b>11.19</b> | <b>0.00</b> |
| OPN+sVCAM1+SAA+CRP        | 0.91 (0.90 - 0.91)        | <10 <sup>-99</sup>          | 70.71           | 59.17        | 29.49        | 6.01        |
| OPN+sVCAM1+SAA+GRO        | 0.90 (0.89 - 0.90)        | <10 <sup>-99</sup>          | 70.10           | 54.70        | 14.70        | 6.10        |
| OPN+sVCAM1+CRP+GRO        | 0.89 (0.89 - 0.90)        | <10 <sup>-99</sup>          | 69.99           | 57.23        | 10.37        | 2.89        |
| OPN+AGP+SAA+CRP           | 0.90 (0.89 - 0.91)        | <10 <sup>-99</sup>          | 68.20           | 44.80        | 9.10         | 0.00        |
| OPN+AGP+SAA+GRO           | 0.89 (0.88 - 0.89)        | <10 <sup>-99</sup>          | 55.44           | 42.36        | 2.00         | 0.00        |
| OPN+AGP+CRP+GRO           | 0.84 (0.83 - 0.85)        | <10 <sup>-99</sup>          | 48.56           | 34.23        | 2.79         | 0.00        |
| OPN+SAA+CRP+GRO           | 0.79 (0.78 - 0.80)        | <10 <sup>-99</sup>          | 45.02           | 23.26        | 8.76         | 1.31        |
