# Supplementary material for: Inflammatory Serum Proteins Are Severely Altered in Metastatic Gastric Adenocarcinoma Patients from the Chinese Population
Source: PubMed Central journal article supplement (PMC4401731; doi:10.1371/journal.pone.0123985), 2015-04-17
Supplement: pone.0123985.s003.pdf [file pone.0123985.s003.pdf]

**S3 Table:** Area under the curve (AUC) and sensitivity of individual proteins and combinations of proteins between healthy controls and metastatic GA samples (H vs M).

| Protein                   | AUC<br>(95% CI)           | p val                       | Specificity (%) |              |              |              |
|---------------------------|---------------------------|-----------------------------|-----------------|--------------|--------------|--------------|
|                           |                           |                             | 90              | 95           | 99           | 100          |
| OPN                       | 0.93 (0.91 - 0.95)        | 1.14 x10 <sup>-27</sup>     | 79.69           | 67.19        | 42.19        | 9.38         |
| sVCAM1                    | 0.72 (0.69 - 0.75)        | 2.49 x10 <sup>-8</sup>      | 39.88           | 29.31        | 15.11        | 10.57        |
| AGP                       | 0.52 (0.48 - 0.55)        | 7.12 x10 <sup>-1</sup>      | 6.17            | 4.12         | 2.47         | 1.23         |
| SAA                       | 0.83 (0.80 - 0.86)        | 2.67 x10 <sup>-17</sup>     | 64.06           | 54.69        | 29.69        | 18.75        |
| CRP                       | 0.74 (0.70 - 0.77)        | 1.88 x10 <sup>-9</sup>      | 50.00           | 39.06        | 28.12        | 10.94        |
| GRO                       | 0.64 (0.60 - 0.68)        | 9.97 x10 <sup>-4</sup>      | 34.92           | 34.92        | 6.35         | 1.59         |
| <b>OPN+sVCAM1+AGP</b>     | <b>0.95 (0.94 - 0.96)</b> | <b>&lt;10<sup>-99</sup></b> | <b>83.13</b>    | <b>67.61</b> | <b>35.22</b> | <b>15.97</b> |
| <b>OPN+sVCAM1+SAA</b>     | <b>0.96 (0.96 - 0.97)</b> | <b>&lt;10<sup>-99</sup></b> | <b>84.96</b>    | <b>76.36</b> | <b>53.06</b> | <b>29.92</b> |
| <b>OPN+sVCAM1+CRP</b>     | <b>0.96 (0.95 - 0.96)</b> | <b>&lt;10<sup>-99</sup></b> | <b>85.53</b>    | <b>72.83</b> | <b>44.53</b> | <b>35.53</b> |
| OPN+sVCAM1+GRO            | 0.94 (0.94 - 0.95)        | <10 <sup>-99</sup>          | 77.71           | 66.72        | 39.01        | 27.24        |
| OPN+AGP+SAA               | 0.93 (0.92 - 0.94)        | <10 <sup>-99</sup>          | 77.57           | 70.66        | 42.24        | 1.23         |
| OPN+AGP+CRP               | 0.91 (0.90 - 0.92)        | <10 <sup>-99</sup>          | 78.11           | 67.72        | 37.64        | 9.13         |
| OPN+AGP+GRO               | 0.91 (0.90 - 0.92)        | <10 <sup>-99</sup>          | 70.80           | 60.70        | 47.86        | 1.53         |
| OPN+SAA+CRP               | 0.92 (0.91 - 0.92)        | <10 <sup>-99</sup>          | 73.19           | 64.37        | 46.23        | 26.00        |
| OPN+SAA+GRO               | 0.92 (0.91 - 0.93)        | <10 <sup>-99</sup>          | 76.46           | 65.23        | 48.77        | 32.92        |
| OPN+CRP+GRO               | 0.92 (0.91 - 0.92)        | <10 <sup>-99</sup>          | 72.80           | 70.97        | 51.82        | 34.50        |
| <b>OPN+sVCAM1+AGP+SAA</b> | <b>0.96 (0.96 - 0.97)</b> | <b>&lt;10<sup>-99</sup></b> | <b>88.08</b>    | <b>76.78</b> | <b>58.20</b> | <b>30.03</b> |
| OPN+sVCAM1+AGP+CRP        | 0.95 (0.94 - 0.96)        | <10 <sup>-99</sup>          | 81.75           | 72.56        | 43.10        | 33.76        |
| OPN+sVCAM1+AGP+GRO        | 0.95 (0.94 - 0.95)        | <10 <sup>-99</sup>          | 81.88           | 67.89        | 49.28        | 30.68        |
| <b>OPN+sVCAM1+SAA+CRP</b> | <b>0.96 (0.95 - 0.96)</b> | <b>&lt;10<sup>-99</sup></b> | <b>83.56</b>    | <b>74.81</b> | <b>50.54</b> | <b>27.19</b> |
| <b>OPN+sVCAM1+SAA+GRO</b> | <b>0.95 (0.94 - 0.96)</b> | <b>&lt;10<sup>-99</sup></b> | <b>82.55</b>    | <b>72.87</b> | <b>61.44</b> | <b>29.77</b> |
| OPN+sVCAM1+CRP+GRO        | 0.94 (0.94 - 0.95)        | <10 <sup>-99</sup>          | 78.85           | 73.40        | 56.57        | 35.42        |
| OPN+AGP+SAA+CRP           | 0.92 (0.91 - 0.93)        | <10 <sup>-99</sup>          | 76.31           | 66.92        | 45.69        | 5.38         |
| OPN+AGP+SAA+GRO           | 0.91 (0.90 - 0.92)        | <10 <sup>-99</sup>          | 74.92           | 65.65        | 41.37        | 0.64         |
| OPN+AGP+CRP+GRO           | 0.91 (0.90 - 0.92)        | <10 <sup>-99</sup>          | 75.39           | 67.76        | 38.47        | 0.78         |
| OPN+SAA+CRP+GRO           | 0.91 (0.90 - 0.92)        | <10 <sup>-99</sup>          | 74.92           | 65.31        | 49.84        | 32.74        |
