# Supplementary material for: Inflammatory Serum Proteins Are Severely Altered in Metastatic Gastric Adenocarcinoma Patients from the Chinese Population
Source: PubMed Central journal article supplement (PMC4401731; doi:10.1371/journal.pone.0123985), 2015-04-17
Supplement: pone.0123985.s004.pdf [file pone.0123985.s004.pdf]

**S4 Table:** Area under the curve (AUC) and sensitivity of individual proteins and combinations of proteins between non-metastatic and metastatic samples (NM vs M).

| Protein                   | AUC<br>(95% CI)           | p val                         | Specificity (%) |              |              |             |
|---------------------------|---------------------------|-------------------------------|-----------------|--------------|--------------|-------------|
|                           |                           |                               | 90              | 95           | 99           | 100         |
| OPN                       | 0.74 (0.70 - 0.78)        | 1.91 x10 <sup>-7</sup>        | 28.12           | 26.56        | 18.75        | 12.50       |
| sVCAM1                    | 0.63 (0.58 - 0.67)        | 5.48 x10 <sup>-3</sup>        | 26.56           | 23.44        | 9.38         | 7.81        |
| AGP                       | 0.79 (0.75 - 0.82)        | 4.44 x10 <sup>-10</sup>       | 42.19           | 34.38        | 21.88        | 21.88       |
| SAA                       | 0.77 (0.73 - 0.81)        | 6.46 x10 <sup>-9</sup>        | 42.19           | 25.00        | 18.75        | 3.12        |
| CRP                       | 0.77 (0.73 - 0.81)        | 4.09 x10 <sup>-9</sup>        | 45.31           | 29.69        | 12.50        | 12.50       |
| GRO                       | 0.70 (0.66 - 0.74)        | 1.63 x10 <sup>-5</sup>        | 30.16           | 14.29        | 3.17         | 1.59        |
| <b>OPN+sVCAM1+AGP</b>     | <b>0.81 (0.80 - 0.82)</b> | <b>&lt;10<sup>-99</sup></b>   | <b>52.22</b>    | <b>41.42</b> | <b>17.46</b> | <b>6.66</b> |
| OPN+sVCAM1+SAA            | 0.76 (0.75 - 0.77)        | 1.64 x10 <sup>-72</sup>       | 41.32           | 25.65        | 13.82        | 7.99        |
| OPN+sVCAM1+CRP            | 0.78 (0.77 - 0.79)        | 5.44 x10 <sup>-86</sup>       | 49.47           | 36.35        | 13.42        | 10.11       |
| OPN+sVCAM1+GRO            | 0.75 (0.74 - 0.76)        | 1.76 x10 <sup>-64</sup>       | 42.45           | 24.06        | 11.16        | 2.99        |
| OPN+AGP+SAA               | 0.80 (0.79 - 0.82)        | 8.33 x10 <sup>-94</sup>       | 45.54           | 35.37        | 22.69        | 15.18       |
| <b>OPN+AGP+CRP</b>        | <b>0.83 (0.82 - 0.84)</b> | <b>&lt;10<sup>-99</sup></b>   | <b>53.13</b>    | <b>38.68</b> | <b>17.66</b> | <b>4.65</b> |
| <b>OPN+AGP+GRO</b>        | <b>0.81 (0.80 - 0.82)</b> | <b>1.43 x10<sup>-97</sup></b> | <b>46.58</b>    | <b>32.59</b> | <b>14.94</b> | <b>0.95</b> |
| OPN+SAA+CRP               | 0.81 (0.80 - 0.82)        | <10 <sup>-99</sup>            | 51.21           | 33.94        | 18.18        | 8.94        |
| OPN+SAA+GRO               | 0.78 (0.77 - 0.79)        | 4.32 x10 <sup>-84</sup>       | 39.26           | 29.45        | 10.74        | 5.98        |
| OPN+CRP+GRO               | 0.78 (0.77 - 0.79)        | 2.36 x10 <sup>-78</sup>       | 41.82           | 34.57        | 18.55        | 5.40        |
| OPN+sVCAM1+AGP+SAA        | 0.80 (0.78 - 0.81)        | 5.99 x10 <sup>-93</sup>       | 45.73           | 37.80        | 21.19        | 9.15        |
| <b>OPN+sVCAM1+AGP+CRP</b> | <b>0.81 (0.80 - 0.82)</b> | <b>1.95 x10<sup>-99</sup></b> | <b>48.12</b>    | <b>42.48</b> | <b>22.73</b> | <b>9.40</b> |
| <b>OPN+sVCAM1+AGP+GRO</b> | <b>0.81 (0.80 - 0.82)</b> | <b>3.55 x10<sup>-98</sup></b> | <b>52.89</b>    | <b>41.32</b> | <b>14.95</b> | <b>4.02</b> |
| OPN+sVCAM1+SAA+CRP        | 0.78 (0.77 - 0.79)        | 3.08 x10 <sup>-81</sup>       | 49.68           | 29.27        | 15.98        | 9.49        |
| OPN+sVCAM1+SAA+GRO        | 0.78 (0.77 - 0.80)        | 6.42 x10 <sup>-85</sup>       | 42.92           | 31.38        | 12.92        | 4.00        |
| OPN+sVCAM1+CRP+GRO        | 0.76 (0.75 - 0.77)        | 1.07 x10 <sup>-69</sup>       | 39.22           | 31.37        | 12.75        | 2.94        |
| <b>OPN+AGP+SAA+CRP</b>    | <b>0.80 (0.79 - 0.82)</b> | <b>1.01 x10<sup>-95</sup></b> | <b>45.30</b>    | <b>37.29</b> | <b>19.26</b> | <b>6.63</b> |
| OPN+AGP+SAA+GRO           | 0.80 (0.78 - 0.81)        | 5.03 x10 <sup>-90</sup>       | 42.77           | 35.38        | 20.13        | 4.25        |
| OPN+AGP+CRP+GRO           | 0.79 (0.78 - 0.80)        | 9.96 x10 <sup>-89</sup>       | 48.05           | 36.97        | 19.97        | 1.87        |
| OPN+SAA+CRP+GRO           | 0.78 (0.76 - 0.79)        | 2.95 x10 <sup>-79</sup>       | 41.39           | 30.17        | 15.17        | 3.79        |
